# Supplementary material for: Resolving chaperone-assisted protein folding on the ribosome at the peptide level
Source: PubMed Central journal article supplement (PMC11638072; doi:10.1038/s41594-024-01355-x), 2024-07-10

Source data for Extended data Fig. 8a

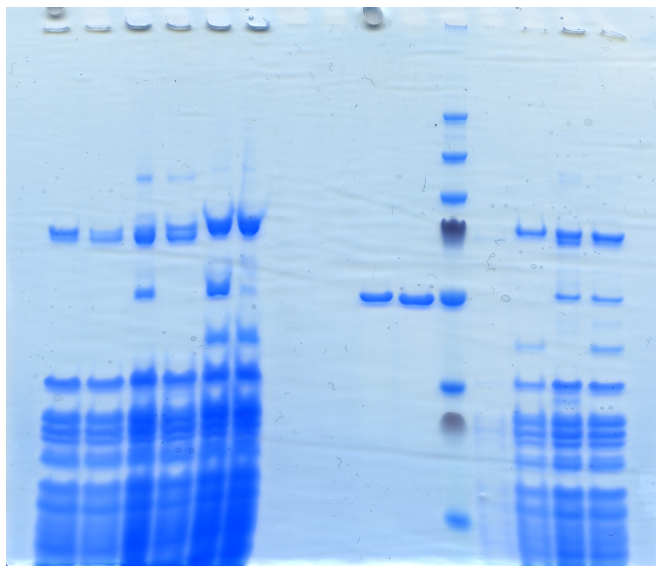

Supplement: 41594_2024_1355_MOESM11_ESM.pdf [file 41594_2024_1355_MOESM11_ESM.pdf]
